1 **Analysis of single-cell RNA-sequencing data to identify quiescent and proliferating neural**  
2 **cell populations in Glioblastoma**

3 Rajeev Vikram <sup>\*1</sup>, Wen-Cheng Chou<sup>1</sup>, Pei-Ei Wu<sup>1</sup>, Wei-Ting Chen<sup>1</sup>, Chen-Yang Shen <sup>\*1,2</sup>

4 <sup>1</sup>Institute of Biomedical Sciences, Taipei 115, Taiwan, <sup>2</sup>Graduate Institute of  
5 Environmental Science, China Medical University, Taichung 404, Taiwan

6 \*corresponding authors: rajeev.vkrm@ibms.sinica.edu.tw, bmcys@ibms.sinica.edu.tw

7 **ABSTRACT**

8 **Background:**

9 Diffuse Glioblastoma (GBM) has high mortality and remains one of the most challenging type of  
10 cancer to treat. Identifying and characterizing the cells populations driving tumor growth and  
11 therapy resistance has been particularly difficult owing to marked inter and intra tumoral  
12 heterogeneity observed in these tumors. These tumorigenic populations contain long lived cells  
13 associated with latency, immune evasion and metastasis.

14 **Methods:**

15 Here, we analyzed the single-cell RNA-sequencing data of high grade glioblastomas from four  
16 different studies using integrated analysis of gene expression patterns, cell cycle stages and copy  
17 number variation to identify gene expression signatures associated with quiescent and cycling  
18 neuronal tumorigenic cells.

19 **Results:**

20 The results show that while cycling and quiescent cells are present in GBM of all age groups,  
21 they exist in a much larger proportion in pediatric glioblastomas. These cells show similarities in

22 their expression patterns of a number of pluripotency and proliferation related genes. Upon  
23 unbiased clustering, these cells explicitly clustered on their cell cycle stage. Quiescent cells in  
24 both the groups specifically overexpressed a number of genes for ribosomal protein, while the  
25 cycling cells were enriched in the expression of high-mobility group and heterogeneous nuclear  
26 ribonucleoprotein group genes. A number of well-known markers of quiescence and proliferation  
27 in neurogenesis showed preferential expression in the quiescent and cycling populations  
28 identified in our analysis. Through our analysis, we identify ribosomal proteins as key  
29 constituents of quiescence in glioblastoma stem cells.

30 Conclusions:

31 This study identifies gene signatures common to adult and pediatric glioblastoma quiescent and  
32 cycling stem cell niches. Further research elucidating their role in controlling quiescence and  
33 proliferation in tumorigenic cells in high grade glioblastoma will open avenues in more effective  
34 treatment strategies for glioblastoma patients.

35

36 Keywords: Glioblastoma, scRNA-seq, Quiescence, proliferation, neurogenesis, GSC, stem cells

37

38

39

40

41

42

43

## INTRODUCTION

44 Diffuse gliomas are tumors of the central nervous system with histological similarity to glial  
45 cells. Worldwide, approximately 100,000 new cases of diffuse glioma are reported every  
46 year[1]. Despite it being a relatively rare cancer type, diffuse gliomas have a very poor prognosis  
47 with high mortality burden. The 2016 WHO classification of gliomas divides them into  
48 astrocytomas, oligodendrogliomas and oligoastrocytomas with subgroupings based on IDH  
49 mutations and 1p19q co-deletion status[2]. Irrespective of the categories, the tumors are graded  
50 from one to four according to the histological degree of malignancy.

51 The grade IV diffuse astrocytoma (IDH-wildtype) also called as glioblastoma (GBM) accounts  
52 for about 75% of all diffuse gliomas with a median survival of about one to two years after  
53 therapy, making it the most lethal of gliomas[2, 3]. Intratumoral heterogeneity in GBM is a key  
54 challenge to developing effective therapeutic strategies. Neurodevelopmental bi-lineage  
55 hierarchy does partially explain the heterogeneity in IDH-mutant and pediatric gliomas,  
56 however, this bi-lineage hierarchy model fails to explain the widespread phenotypic  
57 heterogeneity and evolving phenotypic states in GBM. The cancer stem cells (CSC) theory  
58 suggests that Glioblastoma Stem-like Cells (GSCs) are at the center of the tumor organization  
59 and instrumental in generating and replicating intratumoral phenotypic heterogeneity[4]. Indeed,  
60 similar to other cancers, intratumoral heterogeneity, resistance to treatment and relapse in GBM  
61 has been attribute to this small subpopulation in a number of studies. Although GSCs seem to be  
62 a key target in GBM therapy, their existence and cellular nature remains a hotly debated topic.  
63 While there is evidence pointing to the presence of such GSCs, identification of these cells has  
64 remained a challenge. Primarily because there is no marker which can be considered to  
65 universally identify GSCs[5].

66 In most cancers including GBM, single surface marker approach has been used to identify  
67 CGSCs. A number of cell membrane antigens like CD133, CD15/SSEA, CD44, PDGFRA,  
68 EGFR or A2B5 are shown to be associated with potential GSCs. Earlier studies showing the  
69 tumorigenic potential of cells isolated using one or a combination of these markers [6–11] did  
70 not address the tumorigenic potential of marker negative cells. Later studies however show that  
71 both the marker positive and negative glioma fractions can show multipotent behavior [8, 12].  
72 Recent reports show that marker negative cells are able to generate marker positive cells and  
73 replicate the tumor heterogeneity[13]. Thus the evidence so far indicates a non-hierarchical  
74 model where cells niches with strong cellular plasticity are at the core of recreating intratumoral  
75 heterogeneity. Evidence supporting intratumoral cell niches with high cellular plasticity in  
76 glioblastoma comes from a recent study by Jung, Erik, et al.[14]. The authors show the existence  
77 two complementary cellular niches driving tumor progression and therapy resistance in GBM.  
78 Further evidence of the plastic nature of GSC niches come from studies which demonstrate the  
79 generation of potential GSCs from non-tumorigenic glioma cells [15]. Based on these and a  
80 number of other recent studies, it seems that within the tumor, potential GSCs remain in  
81 interactive niches and are highly plastic in addition to being able to acquire therapy resistance  
82 and tumorigenicity. Recent studies in tumor immunosurveillance evasion suggests that these  
83 niches are composed of small populations of cycling and quiescent stem cell like cells [16].

84 Advances in newer methods to study cellular transcriptomes at the single cell level especially  
85 massively parallel single-cell RNA-sequencing (scRNAseq) has significantly enhanced our  
86 understanding of spatial and temporal heterogeneity in glioblastoma. Recent single cell studies of  
87 gliomas have shown the presence of a progenitor type population [17–19]. Interestingly, in terms  
88 of conventional markers, tumors from different patients show variability in their expression,

89 suggesting heterogeneity within GSCs[20]. As more and more genomic and transcriptomic data  
90 from single cell experiments in gliomas becomes available, it is becoming more evident that  
91 although canonical GSC markers seem to be associated with proliferative cells in low grade  
92 gliomas, such correlation is not evident in GBM[21]. Thus, projects designed to identify GSCs  
93 on the hierarchical CGSC model have largely been ineffective.

94 To develop a better diagnostic and treatment strategy for GBM as well as low grade glioma, is it  
95 important understand the dynamics of the tumor microenvironment, especially the intrinsic  
96 plasticity of the cell niches. Understanding the mechanism of maintenance of these highly plastic  
97 cell subpopulations within the tumor, the role of the microenvironment dynamics in selection and  
98 survival of such populations and their propagation are instrumental in unearthing the reasons for  
99 the development of resistance to Temozolomide (TMZ) chemotherapy and radiotherapy.

100 A number of recent studies have utilized scRNAseq to study gliomas of different origin and  
101 grade generating a wealth of data on the transcriptomic nature of cells within the tumor[14, 17,  
102 19, 22]. While these studies primarily focused on different states of gliomas and tumor-immune  
103 cell interaction, few studies have tried to delineate differences in cellular states within neural  
104 cells in GBM. Reanalysis of these scRNA-seq datasets can give us a deeper understanding of the  
105 genomic and transcriptomic commonalities within malignant neural subpopulations.  
106 Identification of GSC niches with quiescent population perhaps holds and the key to developing  
107 strategies which can target genes/transcripts involved in maintaining GSC plasticity and  
108 crosstalk in high grade gliomas.

109 Here, we analyze the scRNAseq data from four different studies encompassing thousands of  
110 tumor and peripheral cells from pediatric and adult IDH-wildtype glioblastoma patients to  
111 identify and study quiescent and cycling GSCs. The tumor types range from primary to relapsed

112 tumors. Our results show that cycling and quiescent like-cell subpopulation are present in most  
113 GBM tumors with a gene expression signature associated with ribosomal biogenesis, cell cycle  
114 activation and malignancy. Key overexpressed genes include *DCX*, *SOX4* and *DLL3*, known  
115 markers for quiescence, stemness and tumorigenicity. These cells have a Copy number variance  
116 pattern distinguishing them from other neural cells subtypes within the tumor. and key  
117 genes/transcripts expression pattern in these niches across GBM tumor types.

118

119

120

121

122

123

124

125

126

127

128

129

130

131

132

133

134

135

136

## RESULTS

### 137 Selection of datasets and identification of neural cells

138 To identify common GSC like populations across GBMs, we selected scRNAseq datasets from  
139 different studies representing IDH-wildtype, grade IV glioblastomas. Included datasets represent  
140 major patient groups (pediatric, adult and recurrent). Table 1 shows the major characteristics of  
141 the included datasets. For differential gene expression analysis of GBM subpopulations, we also  
142 included brain metastasis (lung squamous cell carcinoma) data set from the study GSE117891.

### 143 Table 1 Dataset Summary

| Dataset          | No. of Cells | Location        | No. of Patients | Tumor Type                                      | Tumor Grade  |
|------------------|--------------|-----------------|-----------------|-------------------------------------------------|--------------|
| <i>GSE84465</i>  | 1745         | Tumor/Periphery | 4               | Primary                                         | IDH-wildtype |
| <i>GSE131928</i> | 1460         | Tumor           | 6               | Primary/<br>Recurrent                           | IDH-wildtype |
| <i>GSE103224</i> | 3679         | Tumor           | 2               | Recurrent                                       | IDH-wildtype |
| <i>GSE117891</i> | 359          | Tumor/Periphery | 1               | Metastatic (Lung<br>Squamous Cell<br>Carcinoma) | NA           |

144

145 Significant inter and intratumoral heterogeneity is a challenge in identifying GSC like niches  
146 because gene expression patterns of different cell types and sample origin (i.e., transcriptomic  
147 diversity of the samples) induce strong variance which often masks the similarities in cellular  
148 programs in small subpopulations. Malignant cells with stem cell like properties are typically a  
149 very small subset of the tumor population. We therefore first sought to enrich our datasets based  
150 on clear cell identity and malignancy. The datasets were first clustered using the standard Seurat-  
151 scTransform pipeline. As, GBMs primarily originate in neural cells, we first identified the clusters  
152 of clear neural/glial (neuronal) or myeloid/immune origin by measuring the expression of known  
153 markers for immune cells (*CD4*, *CD83* & *HLA-DRA*) and neuronal cells (*S100B*, *OLIG1* &  
154 *SCG2*) [23, 24] (Figure 1 B, C). Clusters are represented using Uniform Manifold  
155 Approximation and Projection (UMAP) (Figure 1A). The neuronal cluster significantly  
156 overexpressed *EGFR*, a gene overexpressed in 30-50% of all GBMs and associated with  
157 neoplasia. Interestingly, non-GBM tumor cells (GSE117891) did not express EGFR and showed  
158 markedly different non myeloid/immune cluster profile. (Figure 1D). These clusters showed  
159 distinct expression profiles for glial cell markers for astrocyte(*S100B*) and  
160 oligodendrocytes(*OLIG2*). Indicating the presence of transformed non neural cells in these  
161 clusters (Figure 1 B, C).

162

163

164

165 **Table 1 Study Group Composition**



| <b>Group</b>     | <b>Source</b> | <b>Patient-ID</b> | <b>Molecular Subtype</b> | <b>No. of Transformed Cells</b> |
|------------------|---------------|-------------------|--------------------------|---------------------------------|
| <b>Adult</b>     | GSE84465      | BT-S1             | Classical                | 351                             |
|                  |               | BT-S2             | Classical                | 713                             |
|                  |               | BT-S4             | Classical                | 367                             |
|                  |               | BT-S6             | Proneural                | 143                             |
|                  | GSE103224     | PJ-32             | Mesenchymal              | 574                             |
|                  |               | PJ-35             | Classical                | 3105                            |
|                  | GSE117891     | GS-15             | NA                       | 352                             |
| <b>Pediatric</b> | GSE131928     | BT-749            | Proneural                | 253                             |
|                  |               | BT-771            | Mesenchymal              | 256                             |
|                  |               | BT-786            | Proneural                | 160                             |
|                  |               | BT-830            | Mesenchymal              | 166                             |
|                  |               | BT-920            | Mesenchymal              | 07                              |
|                  |               | BT-1160           | Proneural                | 332                             |
|                  |               | MGH-85            | Proneural                | 245                             |

166

## 167 **Integrated cluster analysis**

168 To identify malignant or transformed stem-like cells, we decided to focus exclusively on  
169 neuronal cells and examine them in detail. To do so, we first removed the immune/myeloid  
170 clusters from the study. Next, we used the mutual nearest neighbors (MNNs) method in  
171 conjugation with Seurat to integrate the datasets. For comparative analysis, we created two

172 integrated datasets comprising of adult and pediatric GBM patients. Table 2 shows the patient  
173 wise detail of the adult and pediatric groups. Both adult and pediatric groups clustered largely  
174 according to cell types and cell stages (figure 2 A, B). Comparison of adult and pediatric groups  
175 showed that a number of genes specific to cell cycle, neuronal and glial cells like *TOP2A*,  
176 *SLC1A2*, *SSR4*, *APOD*, *PLP1*, *CD74*, *RTN1*, *HMGB2*, *CHI3L1*, *SERPINE1* were commonly  
177 overexpressed in certain clusters in both the groups. (figure 2 B). Whilst *SLC1A2*, *APOD*, *PLP1*,  
178 *CD74*, and *RTN1* are cell type specific proteins and expressed by astrocytes, oligodendrocytes,  
179 OPCs and endothelial cells respectively[25], *TOP2A* and *HMGB2* expression is specific to  
180 transcriptional activation and cell cycle[26, 27]. *CHI3L1* and *SERPINE1* are both proteins  
181 related to cell differentiation and malignant transformation[28, 29]. Comparatively, Adult GBM  
182 dataset exhibited greater number of distinct clusters which might be reflective of higher cell type  
183 and disease stage diversity. The presence of specific clusters overexpressing *TOP2A* and *SOX4*  
184 in both adult and pediatric groups indicated a similarity in gene expression profile of these  
185 clusters across groups. Cycling or actively dividing and quiescent stem cells are known to  
186 coexist in adult stem cell niches[30]. Hence, we assessed the expression distribution of known  
187 markers for proliferation (*KI67* and *CD44*) and maintenance of cellular plasticity (*SOX11* and  
188 *DCX*). The expression of these genes coincided with clusters 1, 2 and 3 the adult group while in  
189 the pediatric group, all clusters except clusters 3 and 7 showed high expression of these genes  
190 (Figure 2 C). Interestingly, *CD44* expression did not follow this pattern, its expression was  
191 confined to clusters unrelated to the expression of other markers. Indeed, recent reports have  
192 questioned the validity of *CD44* as a reliable marker of proliferation in glioblastoma [20, 31]. As,  
193 *TOP2A*, *MKI67*, *DCX*, *SOX4* and *SOX11* genes are known to show high expression in cycling  
194 and Quiescent stem cells respectively[26, 32], we suspected the presence of similar niches within

195 the above mentioned clusters in the GBM groups. To verify this hypothesis, we decided to  
196 further analyze the cell type context of these clusters. Top 50 differentially expressed genes for  
197 both adult and pediatric groups are included in additional file 1.

### 198 **Identification of types and cell cycle stages**

199 To determine the presence of cycling and Quiescent cells in both groups, we sought to identify  
200 and distinguish these cells from mature neural and glial cells. We used single cell datasets of  
201 adult and embryonic brain, from Darmanis, Spyros, et al.[25] as reference dataset and performed  
202 unbiased cell type recognition using SingleR package (see methods). The parameters used are  
203 described in the methods section. The results confirmed the initial clustering based predictions  
204 and showed the presence of both cycling stem cell like (cGSC) and Quiescent stem cell like  
205 (qGSC) cells in patient samples from both groups (Figure 3 A). Comparatively, the proportion of  
206 cGSCs and qGSCs was much higher in the pediatric group. Specifically, qGSC population was  
207 markedly low in adult group. Patient samples BT-S2 and BT-S4 had no identified qGSCs, while  
208 only one cell could be identified as qGSC in PJ-32, while PJ-35 had highest number of both  
209 qGSCs and cGSCs in the adult group (Figure 3 D), probably because a large number of cells in  
210 the group are from PJ-35. Expectedly, both these populations were absent in the non-GBM  
211 metastatic tumor sample (GS-15), confirming their importance as key originators of GBM.

### 212 **Analysis of cycling and quiescent cells**

213 To do a comparative analysis of the gene expression patterns between the groups, differential  
214 gene expression analysis was performed using Model-based Analysis of Single Cell  
215 Transcriptomics (MAST) package from R. Significant differentially expressed genes for both  
216 qGSCs and cGSCs were compared with other cell types in both adult and pediatric groups  
217 (figure 3 B). In both groups, qGSCs had a markedly high expression of *DCX*, *SOX4*, *SOX11* and

218 *DLL3* genes. While SOX4 and SOX 11 are both critical in the development and maintenance of  
219 neural pluripotent cells, DCX is an essential factor in neurogenesis in neuronal migration. *DLL3*  
220 is a ligand for the Notch pathway and plays a pleotropic role in notch pathway regulation [32].  
221 On the other hand, cGSCs in both groups were marked by overexpression of HMGB2, HSP90B1  
222 and KPNA2 apart from TOP2A (figure 3 C). HMGB2 is a member of the high mobility protein  
223 family, functioning as a modulator of chromatin structure. However, recent study has shown its  
224 role in transition from quiescence to activated state in neuronal stem cells (NSCs) [27].  
225 Similarly, HSP90B1, a member of the heat shock protein family, has a role in maintaining  
226 embryonic pluripotency [36], whereas KPNA2 is known to be associated with a number of  
227 cancers[37]. comparatively, in the adult group, qGSCs and cGSCs have a marked difference in  
228 their expression profiles, but less so in the pediatric group. A possible reason for this distinction  
229 perhaps is the fact that pediatric brain cells are primed for development.

230 This is also evident from the cell cycle stage prediction. Previous studies have shown that  
231 pluripotency in stem cells is intricately related with cell cycle stages. Whilst a short or truncated  
232 G1 (gap1) phase is considered a hallmark of pluripotent state, lengthening of G1 phase is  
233 observed when the cells enter cycling phase of rapid differentiation[33–35]. To further confirm  
234 the cellular states of these populations, we did a cell cycle state pseudotime prediction using  
235 Tricycle R package as described in the methods section. As, the Quiescent or G0 state is not  
236 exclusively defined in continuous cell state pseudotime embedding, we expected to find the  
237 qGSC cells to be predicted in the G0/G1 phase range, whilst cGSCs to be in G2/M state range.  
238 The results were as expected with qGSC almost exclusively in G0/early G1 state whilst cGSCs  
239 in late G1 to M states (Supplementary Figure S1). Interestingly, the distribution of cells within  
240 cellular states was continuous showing the presence of cells in intermediate states, indicating a

241 transition between qGSC and cGSC states. As, the stem cell like nature of these clusters was  
242 supported by both cell type and cell state analysis, we separated these clusters from other cell  
243 types and did a comparative analysis of underlying gene expression patterns between adult and  
244 pediatric groups to identify universal expression signatures of qGSCs and cGSCs.

#### 245 **Cluster analysis of cycling and quiescent cells**

246 qGSCs and cGSCs from both groups were reclustered using the same unbiased approach of batch  
247 correction as described earlier. Five clusters were observed in both groups (Figure 4 A). Cell  
248 cycle pseudotime analysis of the clusters revealed a clear distinction in the cell cycle phase of the  
249 clusters in both groups (Figure 4 B). Differential gene expression analysis of the clusters not only  
250 revealed the genes involved in quiescence and activation in both groups (Supplementary Figure  
251 S2), but also showed a marked similarity between the clusters. we found that a number of highly  
252 overexpressed genes in clusters 1 and 2 from the adult group were also highly expressed in  
253 clusters 2 and 3 in the pediatric group (Figure 4 C). while the set of clusters overexpressing a  
254 large number of ribosomal genes (RP), especially *RPL23*, *RPL34*, *RPS3*, *RPS13*, *RPS29* also  
255 correlate with qGSC cells, the cGSC dominant set was marked by the overexpression of a  
256 number of high mobility group (HMG) genes including *HMGB1* and *HMGB2* and heterogeneous  
257 nuclear ribonucleoprotein (hnRNP) genes, notably *HNRNPA3* and *HNRNPD*. Recent research  
258 points to intricate relation between ribosomal activity and quiescence in stem cells[38, 39].  
259 Indeed, high level of ribosomal presence can block stem cell differentiation. On the other hand,  
260 while HMG and TOP2A transcription regulators represent dynamic cell division, hnRNPs are  
261 key factors in pre-mRNA processing and transport. Indeed, based on gene expression pattern and  
262 cell cycle pseudotime analysis, a picture of sequential progression between the clusters is  
263 indicated with the overexpression of ribosomal proteins positively correlating with true

264 quiescence while the overexpression of HMG and hnRNPs indicating progression into cycling  
265 phase. In terms of disease model, it is likely that the mechanism of transition from quiescent to  
266 cycling states in GBMs remains similar to that of NSCs. In terms of patient samples, all patient  
267 samples from the adult group had the presence of ribosome overexpressing cluster (cluster 1),  
268 whereas in the pediatric group the ribosome overexpressing cluster (cluster 2) was absent in BT-  
269 830. Similarly, the hnRNP/ HMG overexpressing cluster in the adult group (cluster 2) was absent  
270 in PJ-32 (Figure 4 D). This may be because the number of cells included in the study may not  
271 represent the total tumoral heterogeneity or that the qGSC and cGSC states are interconvertible.  
272 Cluster wise differentially expressed genes for both adult and pediatric groups are included in  
273 additional file 2.

274 Gene ontology (GO) analysis of the clusters further confirmed our observations with the  
275 ribosome overexpressing cluster enriched in the biological process of cotranslational protein  
276 targeting to membrane or endoplasmic reticulum. The HMG and hnRNPs overexpressing  
277 clusters were enriched in cell cycle stages of DNA replication and sister chromatid separation.  
278 These clusters are likely representative of cycling cells from S to G2 phases. Interestingly, in the  
279 pediatric group, we found that the cluster 5 which comprised of a few cells from samples BT-  
280 1160, BT-749, BT-771 and MGH-85 was enriched for neuronal development and differentiation  
281 (Figure 5 A). However, we could not determine if this subpopulation is a transformed NSC  
282 precursor of a specific lineage.

### 283 **Analysis of copy number variations (CNVs)**

284 Copy number alterations (gain and/or loss) of the DNA are known to be associated with disease  
285 progression in various cancers[40]. Based on the gene expression patterns in the qGSCs and  
286 cGSCs, we reasoned that the variations in the chromosomal regions of these cells is likely

287 distinct from normal or differentiated neoplastic glial/neuronal cells. To confirm this hypothesis,  
288 we compared the CNV status of GSC (qGSC and cGSC) clusters with non-malignant and  
289 differentiated neoplastic cells. For comparison, we used the gene expression counts of 332 of  
290 adult normal brain cells from dataset: GSE67835 as reference[25]. The results did not show a  
291 clear similarity in CNV patterns of adult and pediatric groups, however, we did observe a pattern  
292 of copy number gain at chromosomes 19 and 11 in some patients in the pediatric group (BT-  
293 1160, BT-749, BT-771, MGH-85). In terms of pediatric group, we found a consistent CNV  
294 pattern in the GSC population (Figure 5 B) (see also supplementary Figure S3). Chromosomes  
295 19 showed a copy number gain while chromosome10 showed a loss of copy number. Locus gain  
296 at chromosome 19 is relevant in this study's context because Chromosome 19 which has a high  
297 gene density, also harbors a large number of ribosomal genes [41]. While there seems to be a  
298 correlation between copy number alteration at chromosome 19 and ribosomal protein abundance,  
299 we could not verify this correlation in terms of causation. However, we consider this an  
300 interesting finding, which needs to be explored in detail in the future.

301

302

303

304

305

306

307

308

309

310

## DISCUSSION

311 Glioblastomas present marked inter and intra tumoral heterogeneity which is a key hurdle in  
312 identifying tumorigenic cell populations and therefore designing robust therapeutic strategies to  
313 target them. Recent advances in single cell techniques has helped immensely in studying and  
314 intratumoral cellular niches. However, identification of GSCs which are considered to be the  
315 drivers of tumor progression and therapy resistance largely remains a challenge because they  
316 exist as a small population of cycling and quiescent cells within these niches. The dynamic  
317 nature of tumor microenvironment means that these cells show considerable phenotypic  
318 plasticity. This behavior of GSCs would suggest that a marker based strategy, although very  
319 informative in describing cellular state at a given time, is insufficient in identifying stem cell like  
320 tumor populations with marked cellular plasticity. The existence of GSC-like cells in  
321 proliferative and quiescent states within these niches is largely agreed upon, however, the  
322 identification of quiescent GSC-like population has remained a challenge. Through our study of  
323 scRNAseq data from a diverse panel GBM samples we have identified gene signature patterns  
324 uniquely associated with cycling and quiescent states in GBM cells.

325 A number of single cell sequencing based studies in recent years have focused on identifying  
326 GSCs[15, 18, 20, 22, 42], these studies support the theory that malignancy in glioblastoma is a  
327 function of a small number of progenitor like cells which may exist in neural, mesenchymal,  
328 oligodendrocyte or astrocyte like states. The results of this analysis show that although most of  
329 the cycling and quiescent GSCs do share similarities with endothelial and glial like cells, they  
330 have unique transcriptomic profiles which suggest that these cells are maintained in their own  
331 niches within the microenvironment surrounded or populated with mature endothelial, neural



332 and/or glial cells. It is important to underline the observation that while transformed cells from  
333 the non-GBM tumor (GS-15) had endothelial, microglia and oligodendrocyte like populations,  
334 they lacked both cGSC and qGSC like cells. This provides evidence that glioblastoma is  
335 inherently a disease of neural stem/progenitor cells.

336 A number of studies on cancer stem cells have largely focused on the expression of genes related  
337 to a few key transcription factors (Yamanaka factors), OCT4, SOX2, KLF4, and MYC[43]  
338 including NANOG which are well known markers for pluripotency. Similarly, markers for  
339 proliferation like MKI67 and CD44 are the focus of most of the research on proliferating and  
340 pluripotent malignant cells in GBM. However, such approaches overlook the molecular  
341 processes involved in maintaining quiescence or triggering proliferation. Indeed, we observed no  
342 correlation between CD44 expression and cGSCs. On the other hand, our analysis gives further  
343 evidence that SOX4, SOX11 and DCX do overexpress in cycling and quiescent GSCs, however,  
344 studying these markers alone won't explain the molecular process involved in maintaining  
345 quiescence or triggering proliferation.

346 The results of this analysis provides strong evidence that quiescent and cycling stem like cells in  
347 GBM share common molecular pathway to maintain quiescence. By comparing the difference in  
348 the gene expression profiles of qGSC and cGSC clusters, we have been able to capture the  
349 changes in cellular processes of the cells transitioning from quiescent to cycling state. Notably,  
350 the quiescent state is underlined by the overexpression of a number of ribosomal genes while the  
351 cycling state is marked by the overexpression of HMG and hnRNPs. This switch from ribosomal  
352 gene family to HMG and hnRNP genes suggests triggering of entry into cycling phase is  
353 accompanied by profound changes in cell physiology. The presence of migration and neuronal  
354 differentiation related genes like *S100B*, *VIM* and *SPARC* in a quiescent like separate cluster

355 (cluster 5) may show the presence of NSC like or progenitor cells. further research is required to  
356 understand their interaction with other clusters. In terms of patient groups, the results show that  
357 adult tumor samples had a much lower proportion of qGSCs, this is probably reflective of the  
358 differences in developmental state of brain. Importantly, the results suggest that qGSCs and  
359 cGSCs of NSC nature are a key feature of the glioblastoma tumor microenvironment. These  
360 populations are largely interconvertible but are maintained predominantly by the expression of  
361 genes distinct to these states.

362 The role of ribosomal proteins in stem cell maintenance is an area of active research[44]. Recent  
363 research on mouse NSCs has shown low protein synthesis rate as a hallmark of quiescent  
364 state[45]. This phenomenon of quiescent NSCs is probably due to reduced activity of the mTOR  
365 (mammalian target of rapamycin) kinase which acts as a key bridge linking ribosome  
366 biogenesis and protein synthesis to induction of pluripotency, self-renewal and differentiation in  
367 adult stem cells[46, 47]. Experimentally, it has been shown that knockdown of 4E-BP1 (an  
368 mTOR target) promotes differentiation in mouse NSCs[48], mTOR signaling drops when the cell  
369 exits cell cycle, leading to suppression of ribosome synthesis, controlling NSC  
370 differentiation[49]. It is thus likely that a number of ribosomal proteins are maintained in the  
371 quiescent cells to trigger differentiation, thus ensuring an effective transformation of the stem  
372 cell state upon receiving environmental signal[47, 48, 50, 51]. While this is a possible theory for  
373 the overexpression of ribosomal genes in quiescent cells, further studies are needed to understand  
374 this phenomenon in glioblastoma.

375 In conclusion, this study provides vital insight in the expression profile of cycling and quiescent  
376 like cells in glioblastoma. Therapy designs targeting these cells holds great promise in the  
377 treatment of GBM patients because studies have shown that these cells are key to developing

378 therapy resistance, migration and proliferation. Targeting quiescent GSCs is critical to overcome  
379 tumor relapse. This work is an important step in understanding the molecular processes that  
380 govern the quiescent and cycling states in GBMs.

381

382

383

384

385

386

387

388

389

390

391

392

393

394

395

396

397

398

399

## MATERIALS AND METHODS

### 400 **Data resource and selection**

401 All Single-Cell RNA-Seq raw read count matrices and metadata files (wherever available) were  
402 were downloaded from Gene Expression Omnibus (GEO) repository. Specifically, gene/cell  
403 expression counts from datasets GSE84465[17],GSE117891[18],GSE131928[52] and  
404 GSE103224[19] downloaded. The expression matrix for patients included in the study was then  
405 curated from the raw expression files. Raw counts for patient data from GSE131928 was not  
406 made available by the authors. Log2 transformed count (available) was used instead.

### 407 **Data filtration and normalization**

408 All datasets were filtered and analyzed using Seurat V4[53]. Raw data matrix was first filtered  
409 using the slandered Seurat protocol to remove possible low quality cells, cells with <200 or  
410 >3000 transcripts were excluded from the analysis. In addition, cells of poor quality, recognized  
411 as cells with >5% of their transcripts coming from mitochondrial genes, were excluded from the  
412 downstream analysis.

### 413 **Clustering techniques**

414 Primary clustering of the datasets was done following Seurat protocol. Briefly, after filtering and  
415 removal of mitochondrial counts, the data was log normalized and highly variable features were  
416 calculated (for this study, we kept the nfeature setting to 6000). Next, the data was scaled before  
417 performing linear dimensional reduction. High variable principal components were selected  
418 based on percentage variance. Next, the K nearest neighbor graph was constructed based on

419 calculated principal components and clustered. Finally, the dimensional reduction and  
420 visualization was done using Uniform Manifold Approximation and Projection (UMAP).

#### 421 **Differential gene expression analysis**

422 Analysis of differentially expressed genes for each clusters was done by implementing Model-  
423 based Analysis of Single Cell Transcriptomics (MAST) package with Seurat[54].

#### 424 **Integration of datasets**

425 For integrated analysis, following initial Seurat protocol, the fast mutual nearest neighbors  
426 (fastMNN) R/Bioconductor package was applied to correct for differences between data sets  
427 (batch effect correction)[55]. Clustering was done using default parameters.

#### 428 **Reference based cell type identification**

429 Cell type identification was performed using singleR[56]. which is an R/Bioconductor package  
430 to perform unbiased cell type recognition from single-cell RNA sequencing data, by using  
431 reference datasets of pure cell types to identify the cell type of individual single cells  
432 independently. Here we used the dataset from Darmanis, Spyros, et al.[25] as reference dataset  
433 for cell type identification. Cells not recognized as either of the cell types (NAs) were removed  
434 from further analysis.

#### 435 **Cell cycle trajectory inference**

436 Cell cycle phase of the integrated datasets was inferred using the Tricycle R/Bioconductor  
437 package, which uses a fixed reference dataset to infer cell cycle phase of the test dataset[57].  
438 Here, we used the reference dataset provided in tricycle with default parameters to infer cell  
439 cycle positions of cells in integrated data. The inferred positions were then project on to the  
440 UMAP for visualization. The estimated cell cycle position is bound between 0 and  $2\pi$ . The cycle

441 positions approximately relate to theta as:  $0.25\pi$ - $1.75\pi$  to G0/G1 stage,  $0.5\pi$  to start of S stage,  
442  $\pi$  to start of G2M stage and  $1.5\pi$  the middle of M stage.

#### 443 **CNV analysis**

444 To compare the copy number variations between clusters and datasets, we used CONICSmatrix  
445 (Copy-Number Analysis in Single-Cell RNA-Sequencing from an expression matrix) R package  
446 which compares average gene expression of genes within a region to calculate the variance in  
447 copy number across samples[58]. Although reference data is not explicitly required, yet, for  
448 added certainty, we used normal brain expression matrix of 322 normal brain cells from  
449 Darmanis, Spyros, et al[25]. Analysis was done following the default protocol.

#### 450 **Gene Ontology (GO) analysis**

451 Up to 50 (wherever possible) overexpressing genes for each cluster were analyzed for the  
452 enrichment of associated GO terms. Top 5 terms were selected based on fold change and  
453 represented graphically.

#### 454 **Statistical analysis**

455 All data analysis was performed with R. Specific packages used are mentioned in the above  
456 sections.

457

458

459

460

461

462

463

464

465

466

467

468

## FIGURE LEGENDS

469

470 **Figure 1:** Identification of Immune and neural cells clusters

471 (A) UMAP representation of clusters of all datasets. Immune cells are colored yellow; neural  
472 cells are colored blue, for GSE117891, blue represents transformed cluster, yellow-immune and  
473 green, neuronal-like. (B) Bar plot showing cluster wise expression levels of immune cell  
474 markers, bars are color coded according to the clusters in A. (C) Bar plot showing expression  
475 levels of neuronal markers, bars are color coded according to clusters in A.(D) Bar plot showing  
476 expression levels of EGFR, bars are colored red. All expression values are log transformed.

477 **Figure 2:** Cell type comparison of Adult and pediatric groups

478 (A) UMAP representation of Adult and Pediatric groups. Clusters are numbered and color coded.  
479 (B) Violin plot of cluster wise expression distribution of cell cycle and neural cell type markers.  
480 (C) UMAP representation of expression distribution of markers for quiescence, proliferation and  
481 migration in adult and pediatric clusters. Color transition represents expression levels with high  
482 expression represented in deep blue. All expression values are log transformed.

483 **Figure 3:** Group wise comparison of identified cell types

484 (A) Heat map of cluster wise expression comparison of markers for cell types in adult and  
485 pediatric groups. Cells with no strong matches are marked as NA. (B) Violin plot of top nine  
486 overexpressed genes in the cycling cells common to both adult and pediatric groups. (C) Violin  
487 plot of top eight overexpressed genes in the quiescent cells common to both adult and pediatric  
488 groups. (D) Patient sample wise composition of cell types in adult and pediatric groups. All  
489 expression values are log transformed.

490 **Figure 4:** Group wise comparison of cycling and quiescent clusters

491 (A) UMAP representation of integrated clustering of cycling and quiescent cells in Adult and  
492 Pediatric groups. Clusters are numbered and color coded. (B) UMAP representation of cell cycle  
493 status of the clusters from A. Theta values correspond cell cycle stages as follows:  $0.25-1.75\pi \sim$   
494  $G0/G1$  stage,  $0.5\pi \sim$  start of S stage,  $\pi \sim$  start of G2M stage and  $1.5\pi \sim$  middle of M stage. (C)  
495 Cluster wise composition of cycling quiescent populations in patient samples from adult and  
496 pediatric groups.

497 **Figure 5:** Pathway enrichment and copy number variations in cycling and quiescent cells

498 (A) Bar plots of top five biological processes enriched in cycling and quiescent clusters based on  
499 common overexpressed genes in adult and pediatric groups. log fold enrichment of biological  
500 processes is represented as bars. (B) Representative images of inferred CNVs in cycling and  
501 quiescent cells from one pediatric patient sample (BT-1160) compared to normal cells.

502

503

504



505

506

507

508

509

510

511

512

## LIST OF ABBRIVIATIONS

513

514 GBM: Glioblastoma

515 GSC: Glioblastoma stem cell

516 NSC: Neural stem cell

517 UMAP: Uniform Manifold Approximation and Projection

518 cGSC: Cycling glioblastoma stem cell

519 qGSC: Quiescent glioblastoma stem cell

520 HMG: High mobility group protein

521 hnRNP: Heterogeneous nuclear ribonucleoprotein

522

523

524

525

526

527

528

529

530

531

532

533

534

535

536

537

538

539

540

541

542

543

544

545

546

## ADDITIONAL FILES AND SUPPLEMENTARY FIGURES

547

548 Additional File 1: Group wise list of differentially expressed genes according to respective  
549 clusters for Figure 2 A.

550 Additional File 2: Group wise list of differentially expressed genes and common genes according  
551 to respective clusters for Figure 4.

552 Supplementary figure S1: Cell Cycle pseudotime representation of unclustered cycling and  
553 quiescent GSCs from adult and pediatric groups.

554 Supplementary figure S2: Dot plot representation of top ten genes per cluster for figure 4.

555 Supplementary figure S: CNV profiles of GSCs from pediatric group patient samples.

556

557

558

559

560

561

562

563

564

## REFERENCES

565 1. Ferlay J, Colombet M, Soerjomataram I, Mathers C, Parkin DM, Piñeros M, et al. Estimating  
566 the global cancer incidence and mortality in 2018: GLOBOCAN sources and methods. *Int J*  
567 *Cancer*. 2019;144:1941–53.

568 2. Wesseling P, Capper D. WHO 2016 Classification of gliomas. *Neuropathology and Applied*  
569 *Neurobiology*. 2018;44:139–50.

570 3. Berger K, Turowski B, Felsberg J, Malzkorn B, Reifenberger G, Steiger H-J, et al. Age-  
571 stratified clinical performance and survival of patients with IDH-wildtype glioblastoma  
572 homogeneously treated by radiotherapy with concomitant and maintenance temozolomide. *J*  
573 *Cancer Res Clin Oncol*. 2021;147:253–62.

574 4. de Weille J. On the Genesis of Neuroblastoma and Glioma. *International Journal of Brain*  
575 *Science*. 2014;2014:e217503.

576 5. Suvà ML, Tirosh I. The Glioma Stem Cell Model in the Era of Single-Cell Genomics. *Cancer*  
577 *Cell*. 2020;37:630–6.

578 6. Brescia P, Ortensi B, Fornasari L, Levi D, Broggi G, Pelicci G. CD133 is essential for  
579 glioblastoma stem cell maintenance. *Stem Cells*. 2013;31:857–69.

580 7. Beier D, Hau P, Proescholdt M, Lohmeier A, Wischhusen J, Oefner PJ, et al. CD133+ and  
581 CD133– Glioblastoma-Derived Cancer Stem Cells Show Differential Growth Characteristics and  
582 Molecular Profiles. *Cancer Res*. 2007;67:4010–5.

- 583 8. Ogden AT, Waziri AE, Lochhead RA, Fusco D, Lopez K, Ellis JA, et al. Identification of  
584 A2B5+CD133- tumor-initiating cells in adult human gliomas. *Neurosurgery*. 2008;62:505–14;  
585 discussion 514-515.
- 586 9. Anido J, Sáez-Borderías A, González-Juncà A, Rodón L, Folch G, Carmona MA, et al. TGF- $\beta$   
587 Receptor Inhibitors Target the CD44<sup>high</sup>/Id1<sup>high</sup> Glioma-Initiating Cell Population in Human  
588 Glioblastoma. *Cancer Cell*. 2010;18:655–68.
- 589 10. Paugh BS, Zhu X, Qu C, Endersby R, Diaz AK, Zhang J, et al. Novel Oncogenic PDGFRA  
590 Mutations in Pediatric High-Grade Gliomas. *Cancer Res*. 2013;73:6219–29.
- 591 11. Schultz C, Lemke N, Ge S, Golembieski WA, Rempel SA. Secreted Protein Acidic and Rich  
592 in Cysteine Promotes Glioma Invasion and Delays Tumor Growth in Vivo. *Cancer Res*.  
593 2002;62:6270–7.
- 594 12. Shmelkov SV, Butler JM, Hooper AT, Hormigo A, Kushner J, Milde T, et al. CD133  
595 expression is not restricted to stem cells, and both CD133+ and CD133– metastatic colon cancer  
596 cells initiate tumors. *J Clin Invest*. 2008;118:2111–20.
- 597 13. Wang J, Sakariassen PØ, Tsinkalovsky O, Immervoll H, Bøe SO, Svendsen A, et al. CD133  
598 negative glioma cells form tumors in nude rats and give rise to CD133 positive cells. *Int J*  
599 *Cancer*. 2008;122:761–8.
- 600 14. Jung E, Osswald M, Ratliff M, Dogan H, Xie R, Weil S, et al. Tumor cell plasticity,  
601 heterogeneity, and resistance in crucial microenvironmental niches in glioma. *Nat Commun*.  
602 2021;12:1014.

- 603 15. Suvà ML, Rheinbay E, Gillespie SM, Patel AP, Wakimoto H, Rabkin SD, et al.  
604 Reconstructing and reprogramming the tumor propagating potential of glioblastoma stem-like  
605 cells. *Cell*. 2014;157:580–94.
- 606 16. Vinay DS, Ryan EP, Pawelec G, Talib WH, Stagg J, Elkord E, et al. Immune evasion in  
607 cancer: Mechanistic basis and therapeutic strategies. *Seminars in Cancer Biology*.  
608 2015;35:S185–98.
- 609 17. Darmanis S, Sloan SA, Croote D, Mignardi M, Chernikova S, Samghababi P, et al. Single-  
610 Cell RNA-Seq Analysis of Infiltrating Neoplastic Cells at the Migrating Front of Human  
611 Glioblastoma. *Cell Rep*. 2017;21:1399–410.
- 612 18. Yu K, Hu Y, Wu F, Guo Q, Qian Z, Hu W, et al. Surveying brain tumor heterogeneity by  
613 single-cell RNA-sequencing of multi-sector biopsies. *Natl Sci Rev*. 2020;7:1306–18.
- 614 19. Yuan J, Levitin HM, Frattini V, Bush EC, Boyett DM, Samanamud J, et al. Single-cell  
615 transcriptome analysis of lineage diversity in high-grade glioma. *Genome Medicine*. 2018;10:57.
- 616 20. Dirkse A, Golebiewska A, Buder T, Nazarov PV, Muller A, Poovathingal S, et al. Stem cell-  
617 associated heterogeneity in Glioblastoma results from intrinsic tumor plasticity shaped by the  
618 microenvironment. *Nat Commun*. 2019;10:1787.
- 619 21. Guo M, Peng Y, Gao A, Du C, Herman JG. Epigenetic heterogeneity in cancer. *Biomarker*  
620 *Research*. 2019;7:23.

- 621 22. Giraddi RR, Chung C-Y, Heinz RE, Balcioglu O, Novotny M, Trejo CL, et al. Single-Cell  
622 Transcriptomes Distinguish Stem Cell State Changes and Lineage Specification Programs in  
623 Early Mammary Gland Development. *Cell Rep.* 2018;24:1653-1666.e7.
- 624 23. Summers KL, Hock BD, McKenzie JL, Hart DNJ. Phenotypic Characterization of Five  
625 Dendritic Cell Subsets in Human Tonsils. *Am J Pathol.* 2001;159:285–95.
- 626 24. Campanelli JT, Sandrock RW, Wheatley W, Xue H, Zheng J, Liang F, et al. Expression  
627 profiling of human glial precursors. *BMC Dev Biol.* 2008;8:102.
- 628 25. Darmanis S, Sloan SA, Zhang Y, Enge M, Caneda C, Shuer LM, et al. A survey of human  
629 brain transcriptome diversity at the single cell level. *PNAS.* 2015;112:7285–90.
- 630 26. Thakurela S, Garding A, Jung J, Schübeler D, Burger L, Tiwari VK. Gene regulation and  
631 priming by topoisomerase II $\alpha$  in embryonic stem cells. *Nat Commun.* 2013;4:2478.
- 632 27. Kimura A, Matsuda T, Sakai A, Murao N, Nakashima K. HMGB2 expression is associated  
633 with transition from a quiescent to an activated state of adult neural stem cells. *Dev Dyn.*  
634 2018;247:229–38.
- 635 28. Rehli M, Niller H-H, Ammon C, Langmann S, Schwarzfischer L, Andreesen R, et al.  
636 Transcriptional regulation of CHI3L1, a marker gene for late stages of macrophage  
637 differentiation. *J Biol Chem.* 2003;278:44058–67.
- 638 29. Li S, Wei X, He J, Tian X, Yuan S, Sun L. Plasminogen activator inhibitor-1 in cancer  
639 research. *Biomedicine & Pharmacotherapy.* 2018;105:83–94.

- 640 30. Li L, Clevers H. Coexistence of Quiescent and Active Adult Stem Cells in Mammals.  
641 Science. 2010;327:542–5.
- 642 31. Wang H-H, Liao C-C, Chow N-H, Huang LL-H, Chuang J-I, Wei K-C, et al. Whether CD44  
643 is an applicable marker for glioma stem cells. Am J Transl Res. 2017;9:4785–806.
- 644 32. Codega P, Silva-Vargas V, Paul A, Maldonado-Soto AR, DeLeo AM, Pastrana E, et al.  
645 Prospective Identification and Purification of Quiescent Adult Neural Stem Cells from Their In  
646 Vivo Niche. Neuron. 2014;82:545–59.
- 647 33. Pauklin S, Vallier L. The Cell-Cycle State of Stem Cells Determines Cell Fate Propensity.  
648 Cell. 2013;155:135–47.
- 649 34. White J, Dalton S. Cell cycle control of embryonic stem cells. Stem Cell Rev. 2005;1:131–8.
- 650 35. Cheshier SH, Morrison SJ, Liao X, Weissman IL. In vivo proliferation and cell cycle kinetics  
651 of long-term self-renewing hematopoietic stem cells. PNAS. 1999;96:3120–5.
- 652 36. Bradley E, Bieberich E, Mivechi NF, Tangpisuthipongsa D, Wang G. Regulation of  
653 embryonic stem cell pluripotency by heat shock protein 90. Stem Cells. 2012;30:1624–33.
- 654 37. Han Y, Wang X. The emerging roles of KPNA2 in cancer. Life Sciences. 2020;241:117140.
- 655 38. Sharifi S, da Costa HFR, Bierhoff H. The circuitry between ribosome biogenesis and  
656 translation in stem cell function and ageing. Mechanisms of Ageing and Development.  
657 2020;189:111282.
- 658 39. van Velthoven CTJ, Rando TA. Stem Cell Quiescence: Dynamism, Restraint, and Cellular  
659 Idling. Cell Stem Cell. 2019;24:213–25.



- 660 40. Shlien A, Malkin D. Copy number variations and cancer. *Genome Med.* 2009;1:62.
- 661 41. Kenmochi N, Kawaguchi T, Rozen S, Davis E, Goodman N, Hudson TJ, et al. A map of 75  
662 human ribosomal protein genes. *Genome Res.* 1998;8:509–23.
- 663 42. Pang B, Xu J, Hu J, Guo F, Wan L, Cheng M, et al. Single-cell RNA-seq reveals the invasive  
664 trajectory and molecular cascades underlying glioblastoma progression. *Mol Oncol.*  
665 2019;13:2588–603.
- 666 43. Liu X, Huang J, Chen T, Wang Y, Xin S, Li J, et al. Yamanaka factors critically regulate the  
667 developmental signaling network in mouse embryonic stem cells. *Cell Res.* 2008;18:1177–89.
- 668 44. Sanchez CG, Teixeira FK, Czech B, Preall JB, Zamparini AL, Seifert JRK, et al. Regulation  
669 of Ribosome Biogenesis and Protein Synthesis Controls Germline Stem Cell Differentiation. *Cell*  
670 *Stem Cell.* 2016;18:276–90.
- 671 45. Urbán N, van den Berg DLC, Forget A, Andersen J, Demmers JAA, Hunt C, et al. Return to  
672 quiescence of mouse neural stem cells by degradation of a proactivation protein. *Science.*  
673 2016;353:292–5.
- 674 46. Rodgers JT, King KY, Brett JO, Cromie MJ, Charville GW, Maguire KK, et al. mTORC1  
675 controls the adaptive transition of quiescent stem cells from G0 to GAlert. *Nature.*  
676 2014;510:393–6.
- 677 47. Gan B, DePinho R. mTORC1 signaling governs hematopoietic stem cell quiescence. *Cell*  
678 *Cycle.* 2009;8:1003–6.

- 679 48. Guo J, Zhang T, Guo Y, Sun T, Li H, Zhang X, et al. Oocyte stage-specific effects of MTOR  
680 determine granulosa cell fate and oocyte quality in mice. *PNAS*. 2018;115:E5326–33.
- 681 49. mTORC1 controls the adaptive transition of quiescent stem cells from G0 to GAlert | *Nature*.  
682 <https://www.nature.com/articles/nature13255>. Accessed 9 Dec 2021.
- 683 50. Zhang Q, Shalaby NA, Buszczak M. Changes in rRNA transcription influence proliferation  
684 and cell fate within a stem cell lineage. *Science*. 2014;343:298–301.
- 685 51. Blair JD, Hockemeyer D, Doudna JA, Bateup HS, Floor SN. Widespread Translational  
686 Remodeling during Human Neuronal Differentiation. *Cell Rep*. 2017;21:2005–16.
- 687 52. Neftel C, Laffy J, Filbin MG, Hara T, Shore ME, Rahme GJ, et al. An Integrative Model of  
688 Cellular States, Plasticity, and Genetics for Glioblastoma. *Cell*. 2019;178:835-849.e21.
- 689 53. Hao Y, Hao S, Andersen-Nissen E, Mauck WM, Zheng S, Butler A, et al. Integrated analysis  
690 of multimodal single-cell data. *Cell*. 2021;184:3573-3587.e29.
- 691 54. Finak G, McDavid A, Yajima M, Deng J, Gersuk V, Shalek AK, et al. MAST: a flexible  
692 statistical framework for assessing transcriptional changes and characterizing heterogeneity in  
693 single-cell RNA sequencing data. *Genome Biology*. 2015;16:278.
- 694 55. Haghverdi L, Lun ATL, Morgan MD, Marioni JC. Batch effects in single-cell RNA-  
695 sequencing data are corrected by matching mutual nearest neighbors. *Nat Biotechnol*.  
696 2018;36:421–7.

- 697 56. Aran D, Looney AP, Liu L, Wu E, Fong V, Hsu A, et al. Reference-based analysis of lung  
698 single-cell sequencing reveals a transitional profibrotic macrophage. *Nat Immunol.*  
699 2019;20:163–72.
- 700 57. Zheng SC, Stein-O’Brien G, Augustin JJ, Slosberg J, Carosso GA, Winer B, et al. Universal  
701 prediction of cell cycle position using transfer learning. 2021.
- 702 58. Müller S, Cho A, Liu SJ, Lim DA, Diaz A. CONICS integrates scRNA-seq with DNA  
703 sequencing to map gene expression to tumor sub-clones. *Bioinformatics.* 2018;34:3217–9.
- 704

**Figure 1**

bioRxiv preprint doi: <https://doi.org/10.1101/2021.12.09.472030>; this version posted December 10, 2021. The copyright holder for this preprint (which was not certified by peer review) is the author/funder, who has granted bioRxiv a license to display the preprint in perpetuity. It is made available under aCC-BY 4.0 International license.

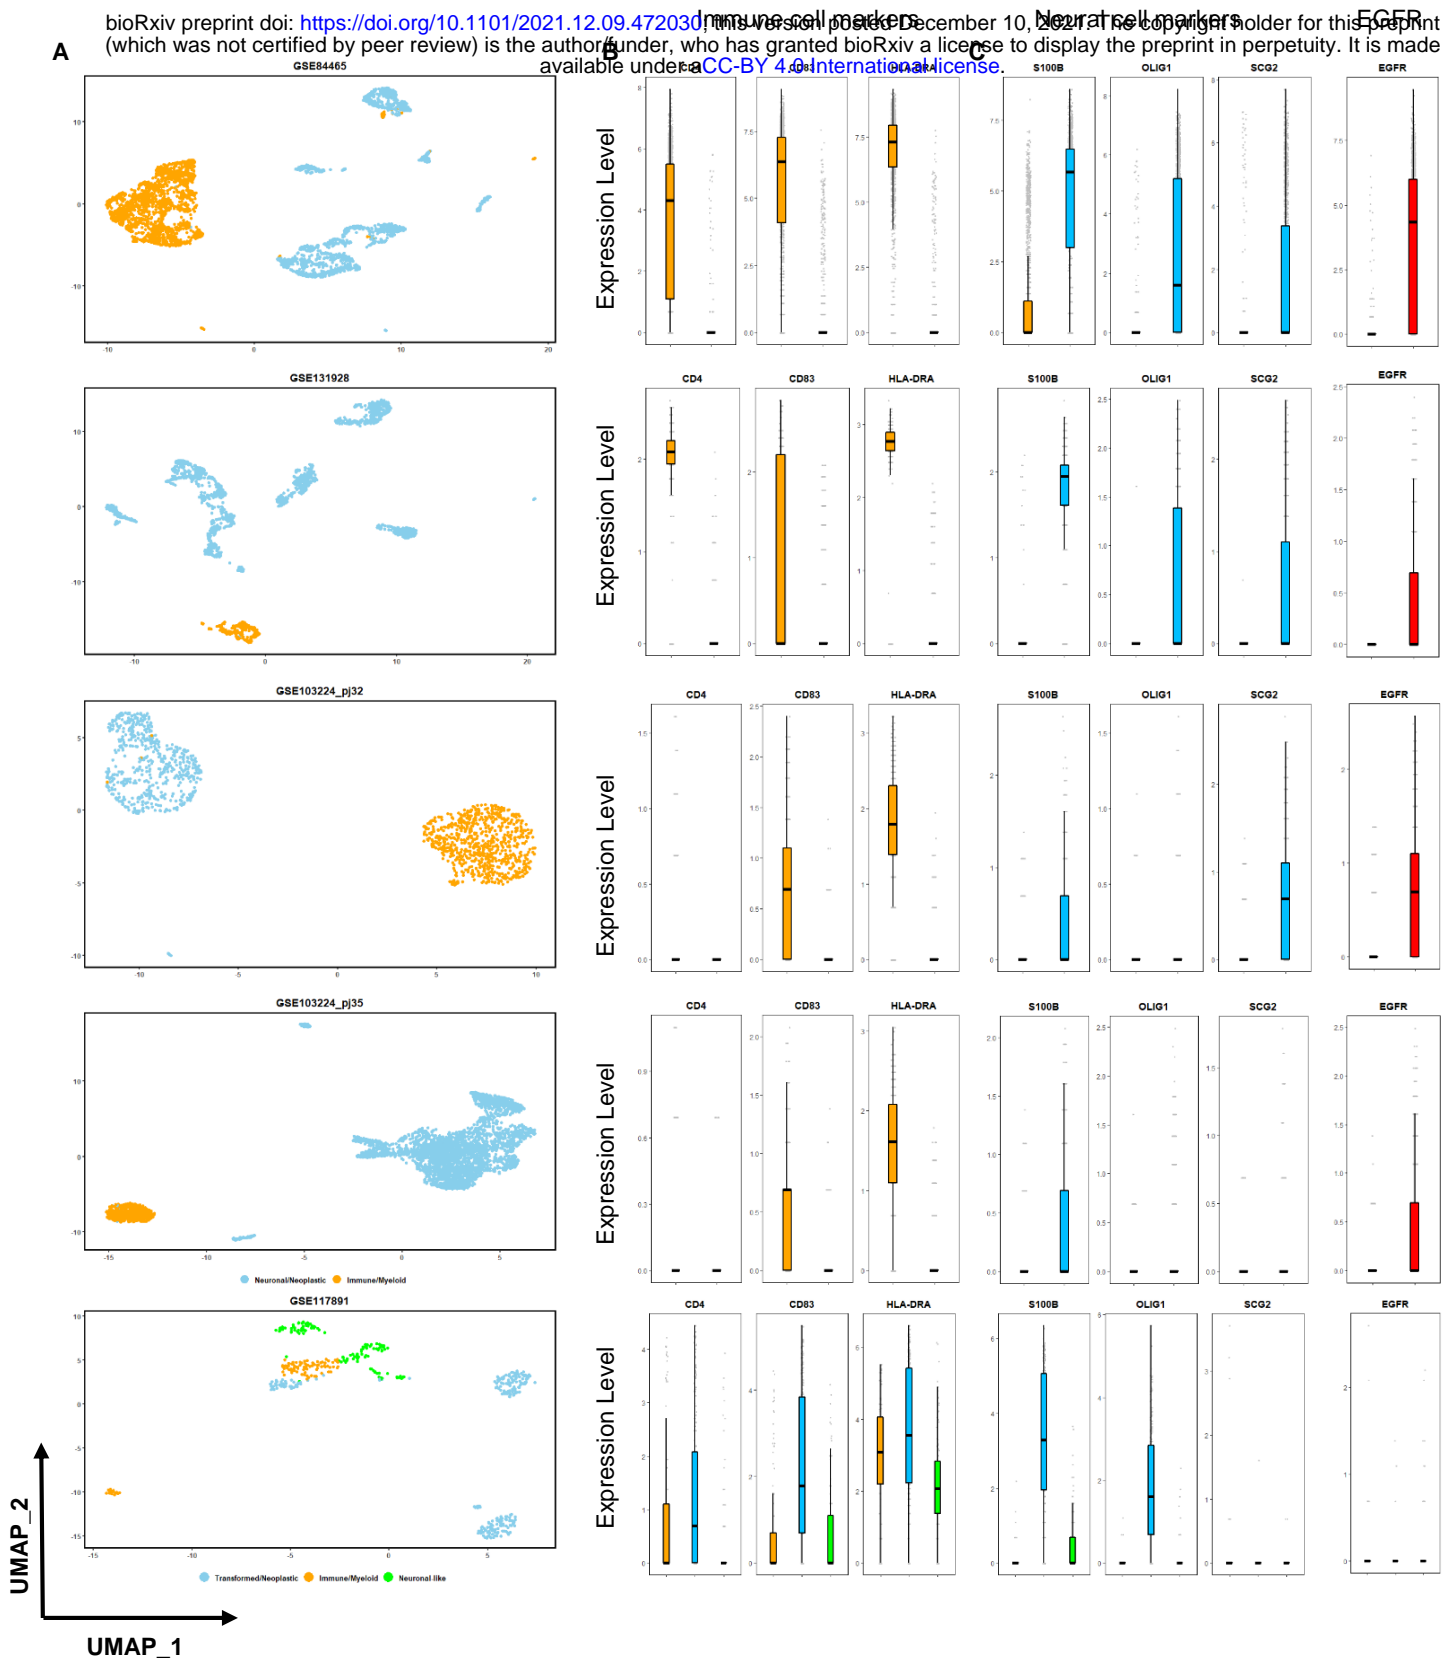

**Figure 2**

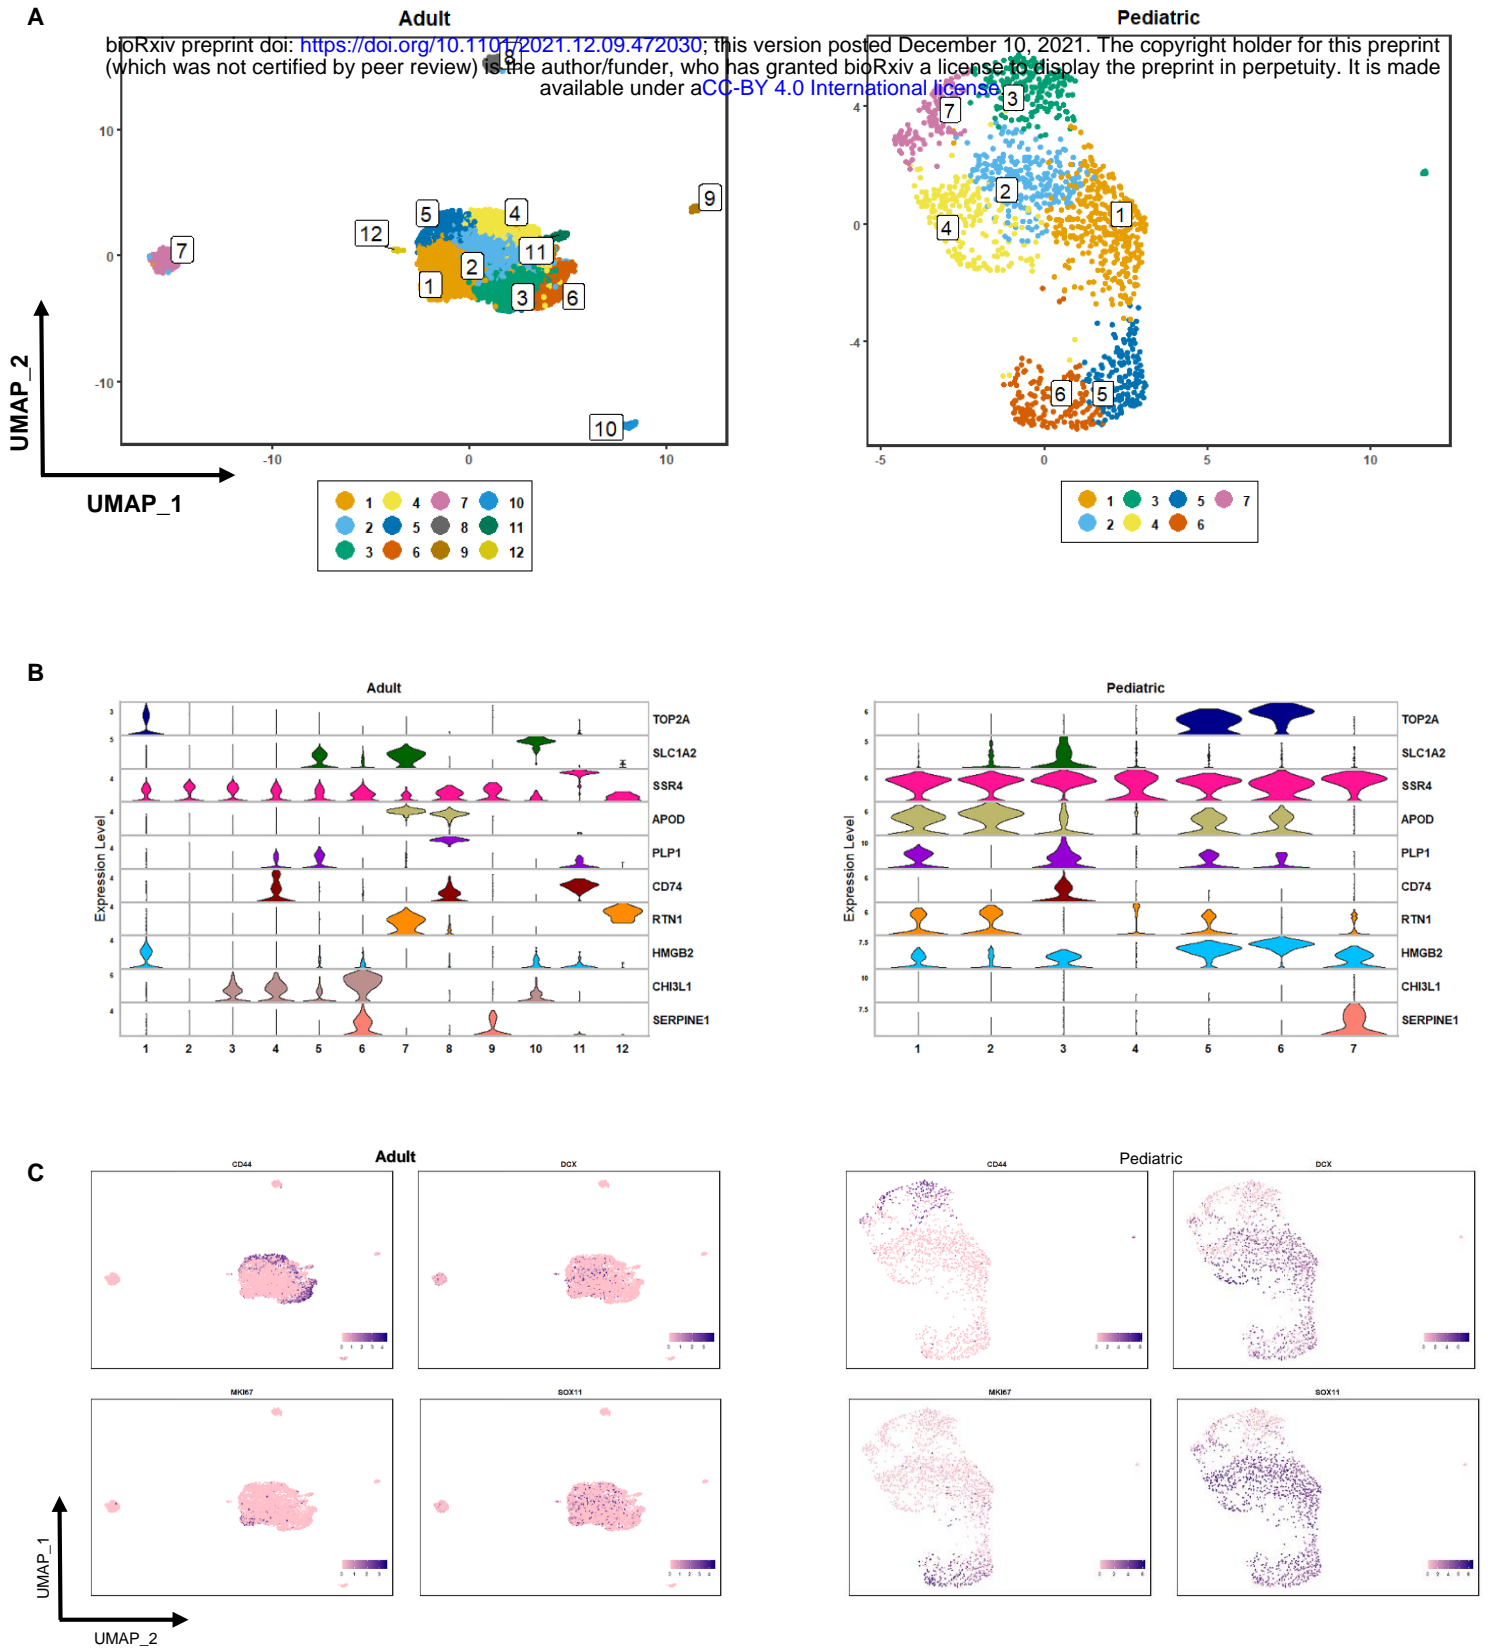

**Figure 3**

bioRxiv preprint doi: <https://doi.org/10.1101/2021.12.09.472030>; this version posted December 9, 2021. The copyright holder for this preprint (which was not certified by peer review) is the author/funder, who has granted bioRxiv a license to display the preprint in perpetuity. It is made available under aCC-BY 4.0 International license.

**A**

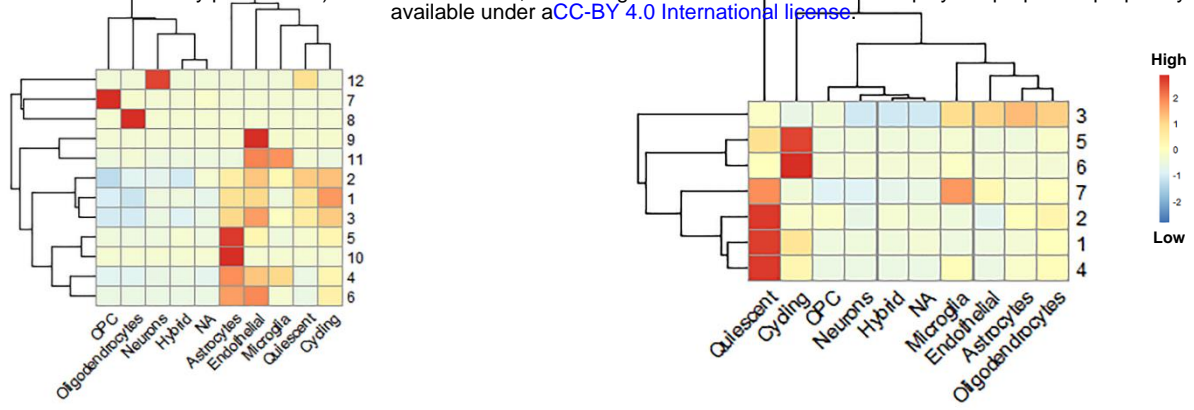

**B**

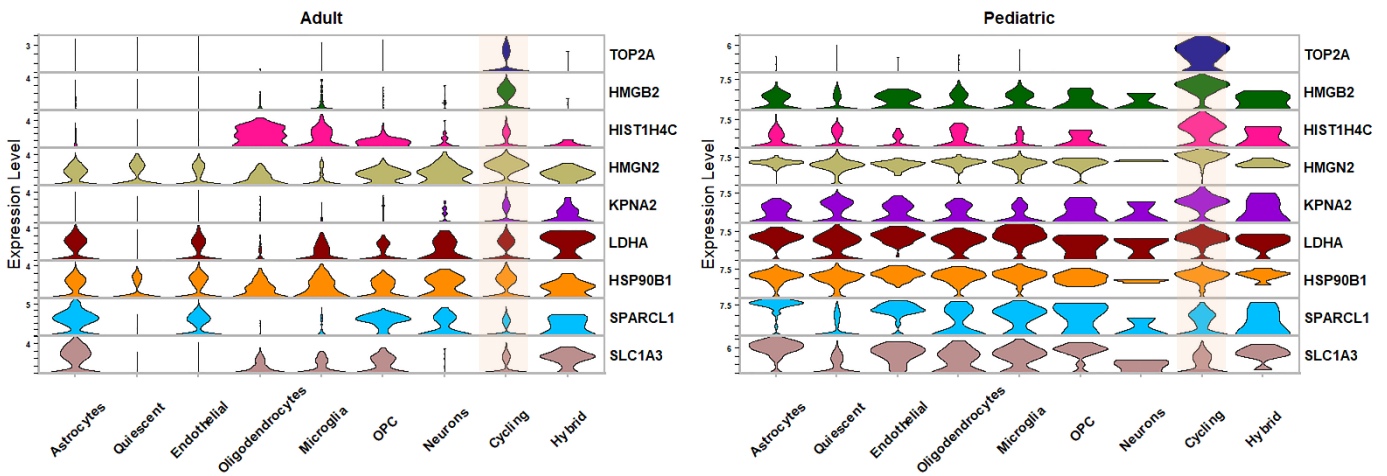

**C**

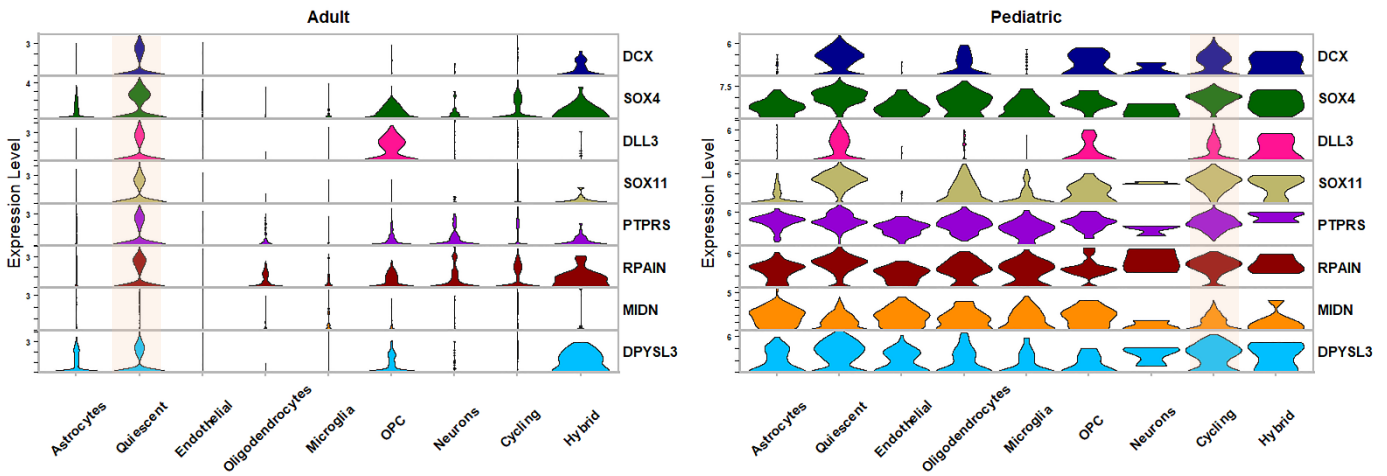

**D**

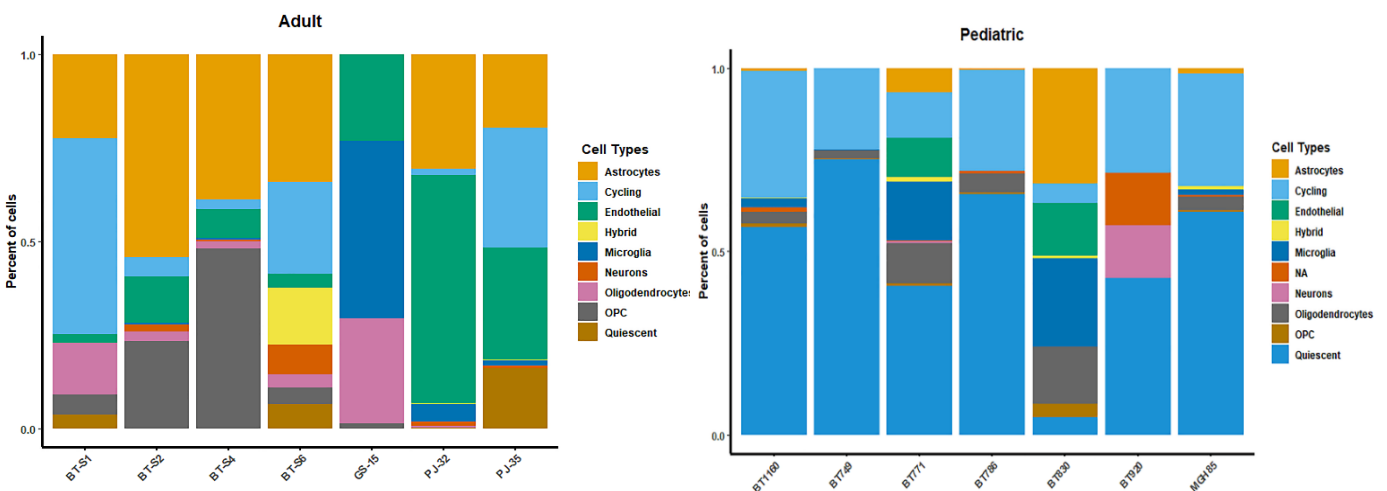

**Figure 4**

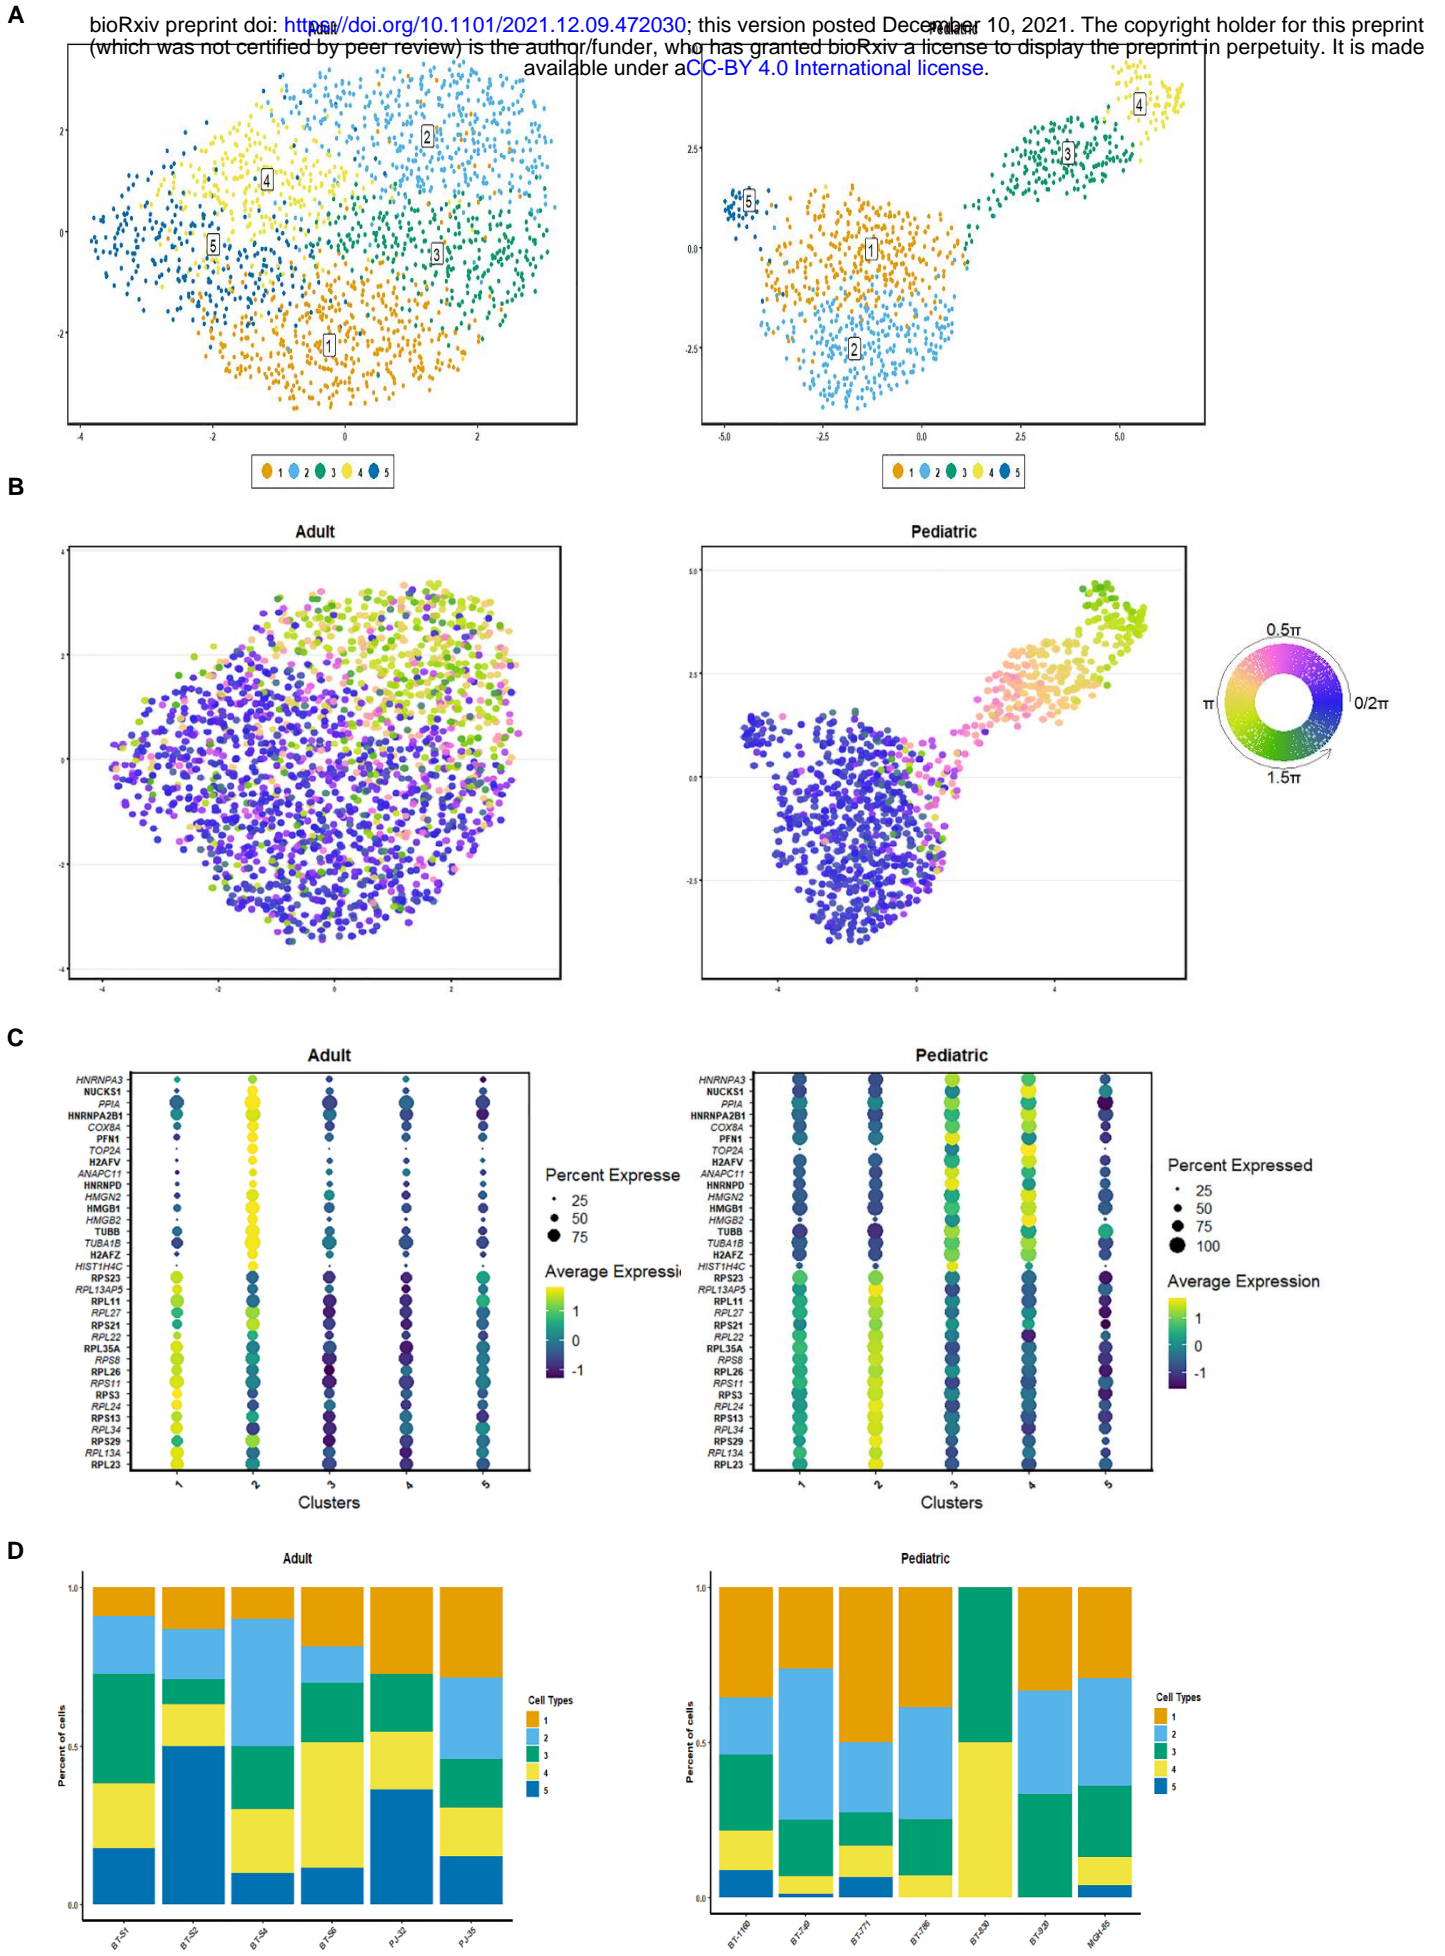

# Figure 5

BioRxiv preprint doi: <https://doi.org/10.1101/2021.12.09.472030>; this version posted December 10, 2021. The copyright holder for this preprint (which was not certified by peer review) is the author/funder, who has granted bioRxiv a license to display the preprint in perpetuity. It is made available under aCC-BY 4.0 International license.

## qGSC Clusters

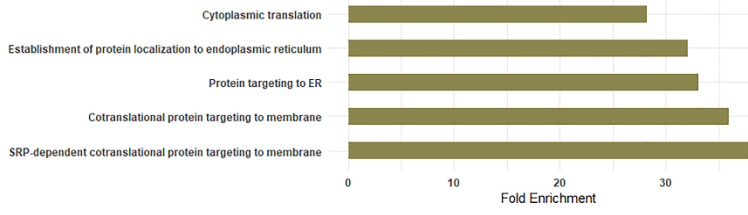

## cGSC clusters

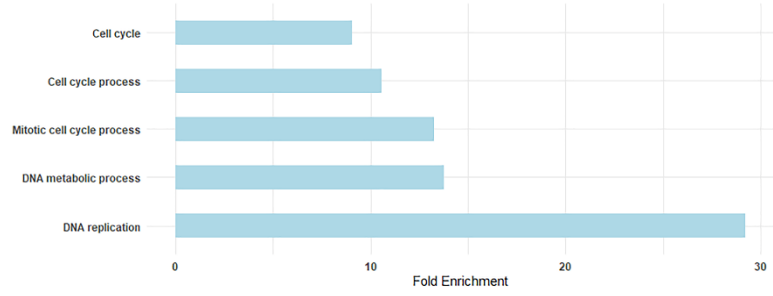

## NSC- Precursor like Cluster

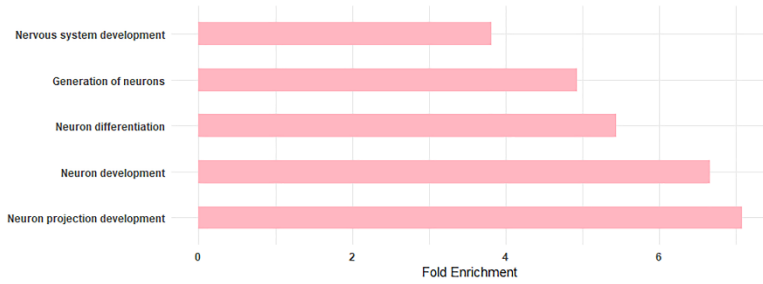

## B

### Normal

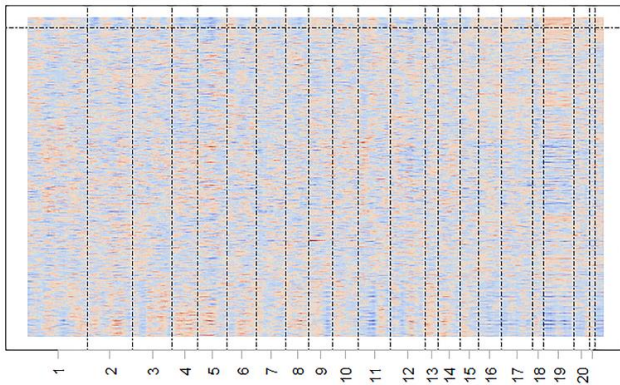

### BT-1160

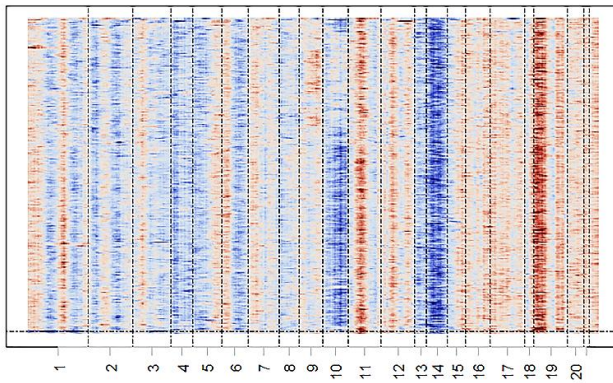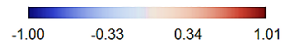

Source: http://biorxiv.org/content/10.1101/2021.12.09.472030v1.full.pdf
